# Supplementary material for: Fcγ receptor-mediated influx of S100A8/A9-producing neutrophils as inducer of bone erosion during antigen-induced arthritis
Source: Springer Nature journal article supplement (doi:10.1186/s13075-018-1584-1), 2018-05-02
Supplement: MOESM1 [file 15733484]

## Additional file 1

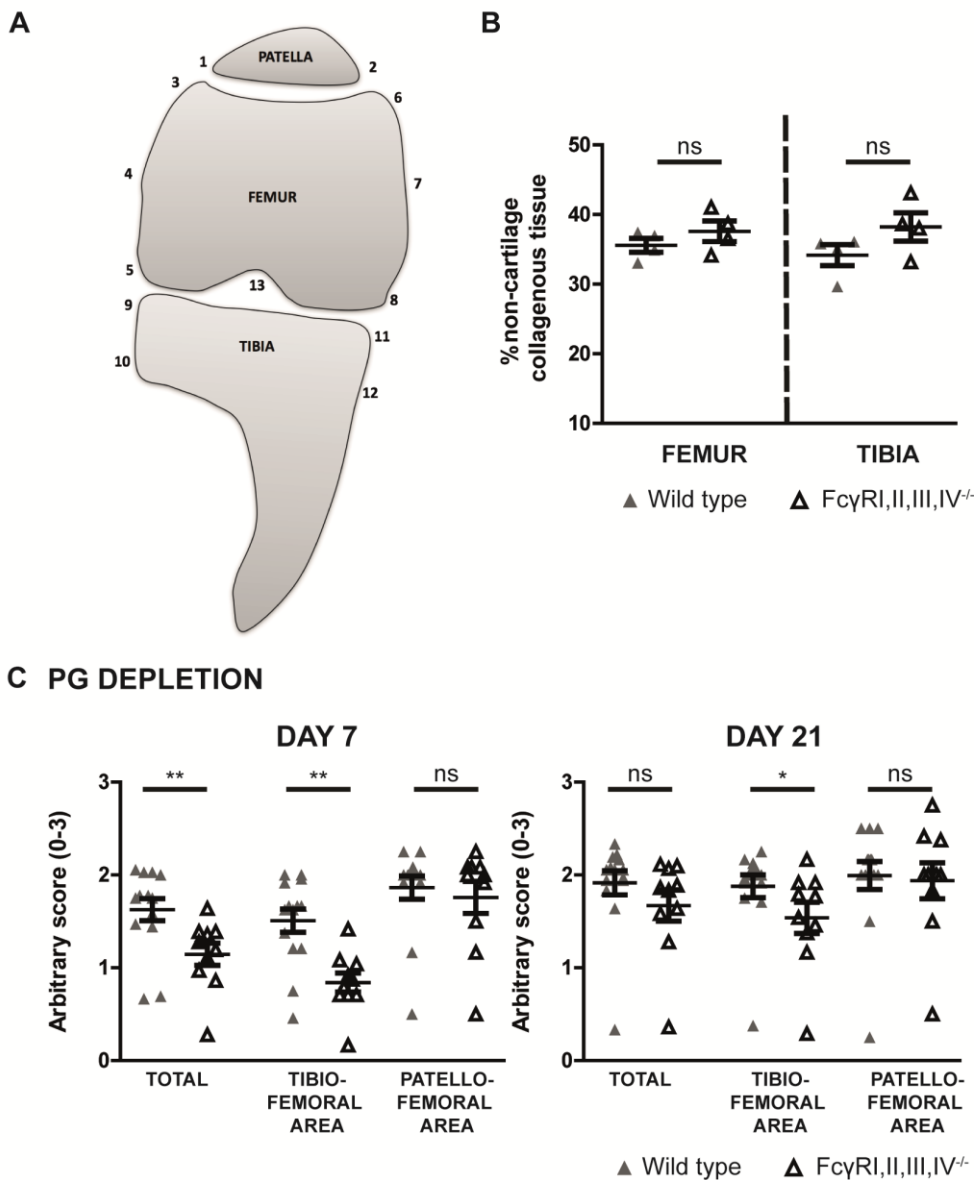

Graphical representation of bone erosion scoring method, quantification of non-cartilage collagenous tissue and proteoglycan depletion.

**A)** Graphical representation of the 13 locations along the patella, femur, tibia and cruciate ligament where bone erosion was scored. **B)** Quantification of the non-cartilage collagenous tissue (blue staining in Safranin O/Fast Green staining) in femur and tibia showed no differences between naive FcγRI,II,III,IV<sup>-/-</sup> and wild type mice. ns=not significant. **C)** Quantification of PG depletion showed a significant decrease at the tibio-femoral area in the joints of FcγRI,II,III,IV<sup>-/-</sup> mice as compared to their WT controls (n=10 and 14 joints per group respectively) at both 7 and 21 days after AIA induction. Scatter plots are shown, with horizontal and vertical lines showing mean +/- SEM values. ns=not significant; \* =  $P < 0.05$  \*\* =  $P < 0.01$ ; versus WT controls.
