# Supplementary material for: Fcγ receptor-mediated influx of S100A8/A9-producing neutrophils as inducer of bone erosion during antigen-induced arthritis
Source: Springer Nature journal article supplement (doi:10.1186/s13075-018-1584-1), 2018-05-02
Supplement: MOESM2 [file 15733484]

## Additional file 2

### Flow cytometry gating strategy

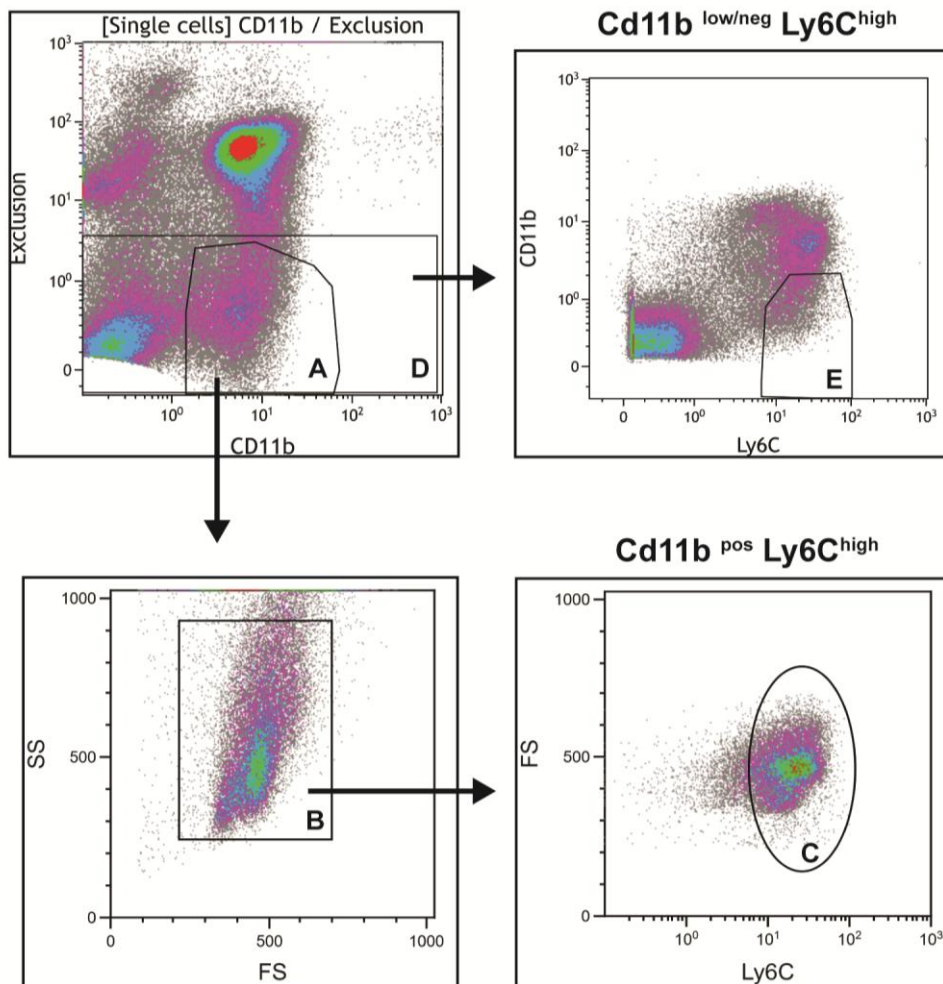

### Gating strategy for flow cytometry analysis

Gating strategy for flow cytometry analysis used to identify CD11b<sup>pos</sup> Ly6C<sup>high</sup> and CD11b<sup>low/neg</sup> Ly6C<sup>high</sup> osteoclast precursor populations. First, single cells were selected. For identification of CD11b<sup>pos</sup> Ly6C<sup>high</sup> monocytes, cells negative for CD90.2, CD45R/B220, CD49b, NK1.1, Ly6G and positive for CD11b were selected (gate A). Subsequently, cells were back gated for side scatter and FS to exclude cells with high granularity (gate B) and finally Ly6C<sup>high</sup> cells were selected (gate C). For identification of CD11b<sup>low/neg</sup> Ly6C<sup>high</sup>, after exclusion of CD90.2, CD45R/B220, CD49b, NK1.1, Ly6G positive cells (gate D), cells were gated for their expression of CD11b and Ly6C (CD11b<sup>low/neg</sup> Ly6C<sup>high</sup>) (gate E).
